# Supplementary material
Source: HighWire-hosted journal article supplement (http://www.cfp.ca/highwire/filestream/32051/field_highwire_adjunct_files/0/373_PA_Assessment__Sheet.pdf)
Supplement: 373_PA_Assessment__Sheet.pdf [file 373_PA_Assessment__Sheet.pdf]

# PA Assessment Sheet

Clinic date: \_\_\_\_\_

PA: \_\_\_\_\_

MD: \_\_\_\_\_

| Presenting Complaint                                                              | Skill Level        |   |   |   |             |
|-----------------------------------------------------------------------------------|--------------------|---|---|---|-------------|
|                                                                                   | Full support ----- |   |   |   | Independent |
| 1)<br>PA/MD Comments: _____                                                       | 1                  | 2 | 3 | 4 | 5           |
| 2)<br>PA/MD Comments: _____                                                       | 1                  | 2 | 3 | 4 | 5           |
| 3)<br>PA/MD Comments: _____                                                       | 1                  | 2 | 3 | 4 | 5           |
| 4)<br>PA/MD Comments: _____                                                       | 1                  | 2 | 3 | 4 | 5           |
| 5)<br>PA/MD Comments: _____                                                       | 1                  | 2 | 3 | 4 | 5           |
| 6)<br>PA/MD Comments: _____                                                       | 1                  | 2 | 3 | 4 | 5           |
| Enacting Prescriptions / Ordering Investigations<br>knowledge and appropriate use | Skill Level        |   |   |   |             |
|                                                                                   | Full support ----- |   |   |   | Independent |
| 1)                                                                                | 1                  | 2 | 3 | 4 | 5           |
| 2)                                                                                | 1                  | 2 | 3 | 4 | 5           |
| 3)                                                                                | 1                  | 2 | 3 | 4 | 5           |
| 4)                                                                                | 1                  | 2 | 3 | 4 | 5           |
| 5)                                                                                | 1                  | 2 | 3 | 4 | 5           |
| 6)                                                                                | 1                  | 2 | 3 | 4 | 5           |
| 7)                                                                                | 1                  | 2 | 3 | 4 | 5           |
